# Supplementary material for: Tetrachloro-tetra(perylene bisimides): an approach towards N-type graphenenanoribbons
Source: Royal Society of Chemistry journal article supplement (doi:10.1039/b926618f), 2010-01-01

# Tetrachloro-Tetra(perylene bisimides) : An Approach towards *N*-type Graphene Nanoribbons

Yonggang Zhen, Chunru Wang and Zhaohui Wang\*

## Materials and Methods

All chemicals were purchased from commercial suppliers and used without further purification unless otherwise specified. DMSO was freshly distilled from  $\text{CaH}_2$ . *N,N'*-di(2,6-diisopropylphenyl)-1,6,7,12-tetrachloroperylene-3,4:9,10-tetracarboxylic bisimide **2** was prepared according to known procedure,<sup>1</sup> and 4Cl-diPBI **3** was prepared according to the literature reported by our group.<sup>2</sup>

<sup>1</sup>H NMR spectra were recorded in deuterated solvents on a Bruker ADVANCE 400 NMR Spectrometer and a Bruker ADVANCE 600 NMR Spectrometer. <sup>1</sup>H NMR chemical shifts are reported in ppm downfield from tetramethylsilane (TMS) reference using the residual protonated solvent as an internal standard. Mass spectra (MALDI-TOF-MS) were determined on a Bruker BIFLEX III Mass Spectrometer.

Absorption spectra were measured with Hitachi (model U-3010) UV-Vis spectrophotometer in a 1-cm quartz cell. Cyclic voltammograms (CVs) were recorded on a Zahner IM6e electrochemical workstation using glassy carbon discs as the working electrode, Pt wire as the counter electrode, Ag/AgCl electrode as the reference electrode, and ferrocene/ferrocenium as an internal potential marker. 0.1 M tetrabutylammonium hexafluorophosphate (TBAPF<sub>6</sub>) dissolved in  $\text{CH}_2\text{Cl}_2$  was employed as the supporting electrolyte.  $\text{CH}_2\text{Cl}_2$  was dried over calcium hydride and degassed prior to measurement. Two isomers of 4Cl-tetra(perylene bisimides) were separated by HPLC, using Cosmosil Buckyprep as the column and toluene as the eluent.

## Synthesis and characterization of 4Cl-tetraPBIs **1a** and **1b**

A mixture of 4Cl-diPBI **3** (1.1 g, 0.71 mmol), nano copper powder (440mg, 6.92 mmol),  $\text{Pd}(\text{PPh}_3)_4$  (220 mg, 0.19 mmol) in 400 ml dry DMSO was heated at 110 °C under Ar for 10 h. The cooled mixture was poured into water and the product was extracted with ethyl acetate. The organic layers were separated, washed with brine, dried over  $\text{Na}_2\text{SO}_4$ , and purified by column separation (silica gel, petroleum ether/ $\text{CH}_2\text{Cl}_2$  = 1:1). Yield 88 mg (8.4%) **4Cl-tetraPBIs** as dark-green solids, the obtained **4Cl-tetraPBIs** were separated by HPLC into two fractions using Cosmosil Buckyprep as the column and toluene as the eluent. After separation, **4Cl-tetraPBI 1a** (22 mg) and **1b** (66 mg) were obtained, in yield of 2.1% and 6.3%, respectively. MS (MALDI-TOF): calcd for **4Cl-tetraPBIs**  $\text{C}_{144}\text{H}_{114}\text{N}_6\text{O}_{12}$ , 2963.0 [M]<sup>+</sup> (maximum peak), found, **4Cl-tetraPBI 1a**  $m/z$  = 2963.4 (maximum peak); **4Cl-tetraPBI 1b**  $m/z$  = 2963.4 (maximum peak).

**4Cl-tetraPBI 1a.** <sup>1</sup>H NMR ( $\text{CDCl}_3$ , 400 MHz, 298 K):  $\delta$  = 11.30 (s, 1H, perylene-H), 10.83 (d, 2H, perylene-H), 10.71 (s, 1H, perylene-H), 10.66 (s, 1H, perylene-H), 10.37 (s, 1H, perylene-H), 9.42 (s, 2H, perylene-H), 9.13 (s, 2H, perylene-H), 7.46-7.58 (m, 16H, phenyl-H), 7.35 (d, 2H, phenyl-H), 7.22

(d, 2H, phenyl-H), 7.17 (d, 2H, phenyl-H), 7.03 (d, 2H, phenyl-H), 7.02 (m, 2H, phenyl-H), 4.27 (b, 1H, isopropyl-H), 3.66-3.73 (m, 4H, isopropyl-H), 3.21 (m, 1H, isopropyl-H), 3.02 (m, 2H, isopropyl-H), 2.58 (m, 2H, isopropyl-H), 2.33 (m, 4H, isopropyl-H), 2.10 (m, 2H, isopropyl-H), 1.86 (m, 2H, isopropyl-H), 1.70-1.78 (m, 24H, isopropyl-H), 1.30 (m, 24H, isopropyl-H), 1.03-1.11 (m, 24H, isopropyl-H), 0.65-0.87 (m, 18H, isopropyl-H), 0.55 (m, 6H, isopropyl-H).  $^{13}\text{C}$  NMR ( $\text{CDCl}_3$ , 150 MHz, 298K):  $\delta$  = 163.7, 163.0, 147.4, 146.4, 145.4, 144.8, 136.4, 130.9, 130.6, 130.4, 129.9, 129.8, 127.3, 127.1, 126.4, 124.8, 124.6, 124.3, 123.8, 121.4, 120.9, 119.2, 31.9, 30.6, 29.9, 29.7, 29.3, 24.9, 24.1, 23.8, 23.5, 22.7.

**4Cl-tetraPBI 1b.**  $^1\text{H}$  NMR ( $\text{CDCl}_3$ , 400 MHz, 298 K):  $\delta$  = 11.15 (s, 2H, perylene-H), 10.68 (s, 2H, perylene-H), 10.64 (s, 2H, perylene-H), 9.42 (s, 2H, perylene-H), 9.12 (s, 2H, perylene-H), 7.45-7.59 (m, 18H, phenyl-H), 7.33 (d, 2H, phenyl-H), 7.29 (d, 2H, phenyl-H), 7.08 (d, 2H, phenyl-H), 4.24 (b, 2H, isopropyl-H), 3.64 (m, 2H, isopropyl-H), 3.21 (m, 2H, isopropyl-H), 3.01 (m, 2H, isopropyl-H), 2.58 (m, 2H, isopropyl-H), 2.36 (m, 4H, isopropyl-H), 1.86 (m, 2H, isopropyl-H), 1.78 (m, 12H, isopropyl-H), 1.70 (m, 6H, isopropyl-H), 1.48 (m, 6H, isopropyl-H), 1.34 (m, 30H, isopropyl-H), 1.09 (m, 6H, isopropyl-H), 1.02 (m, 12H, isopropyl-H), 0.85 (m, 18H, isopropyl-H), 0.55 (m, 6H, isopropyl-H).  $^{13}\text{C}$  NMR ( $\text{CDCl}_3$ , 100 MHz, 298K):  $\delta$  = 163.7, 163.4, 163.2, 163.1, 163.0, 147.1, 146.4, 146.2, 145.4, 145.1, 144.4, 136.5, 136.4, 131.5, 130.8, 130.6, 130.4, 130.3, 130.0, 129.8, 129.6, 129.0, 127.9, 127.6, 127.0, 126.4, 124.8, 124.6, 124.4, 124.2, 123.8, 123.0, 121.5, 120.8, 119.6, 119.2, 30.2, 29.7, 29.2, 29.1, 28.9, 25.2, 24.9, 24.5, 24.3, 24.1, 23.8.

## Additional References

- S1. (a) H. Quante and K. Müllen, *Angew. Chem. Int. Ed.*, 1995, **34**, 1323; (b) Würthner, F., Sautter, A. And Schilling, J. *J. Org. Chem.*, 2002, **67**, 3037.  
S2. H. Qian, Z. Wang, W. Yue and D. Zhu, *J. Am. Chem. Soc.*, 2007, **129**, 10664.

## MALDI-TOF MS of 1a

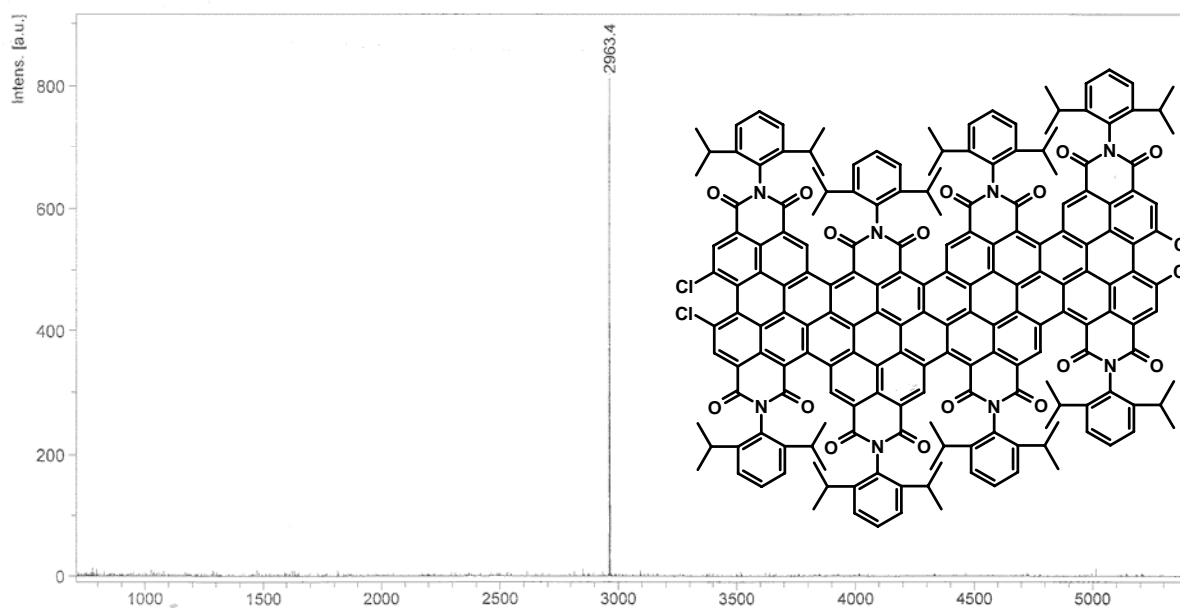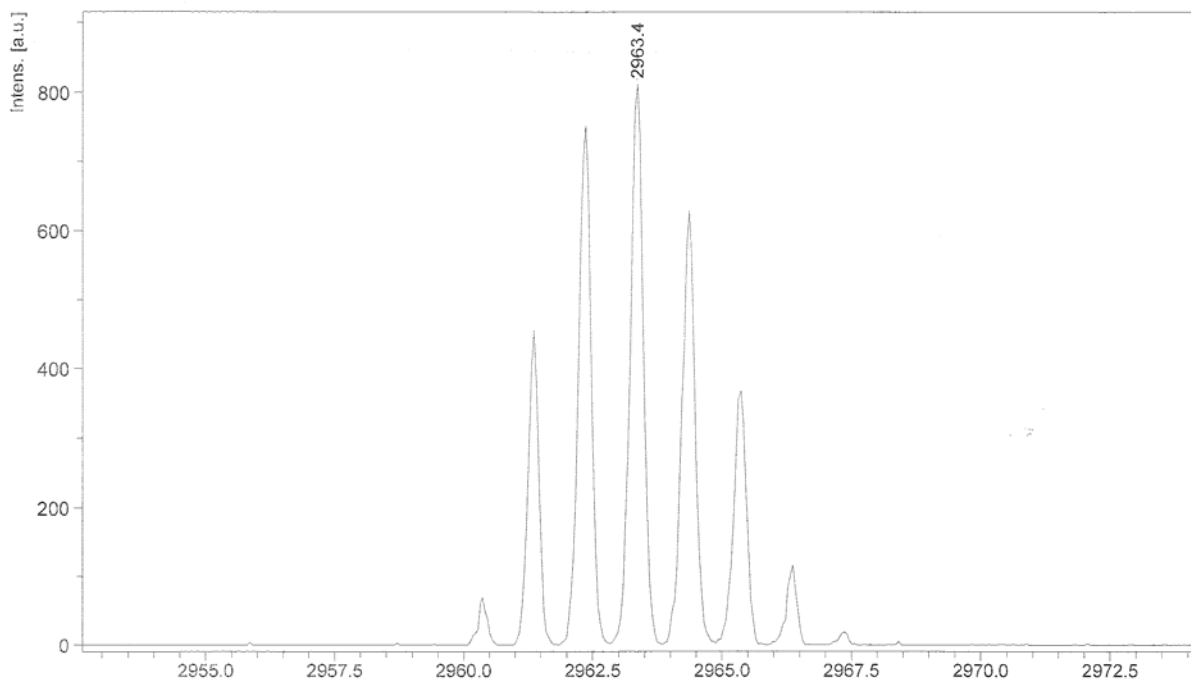

## MALDI-TOF MS of 1b

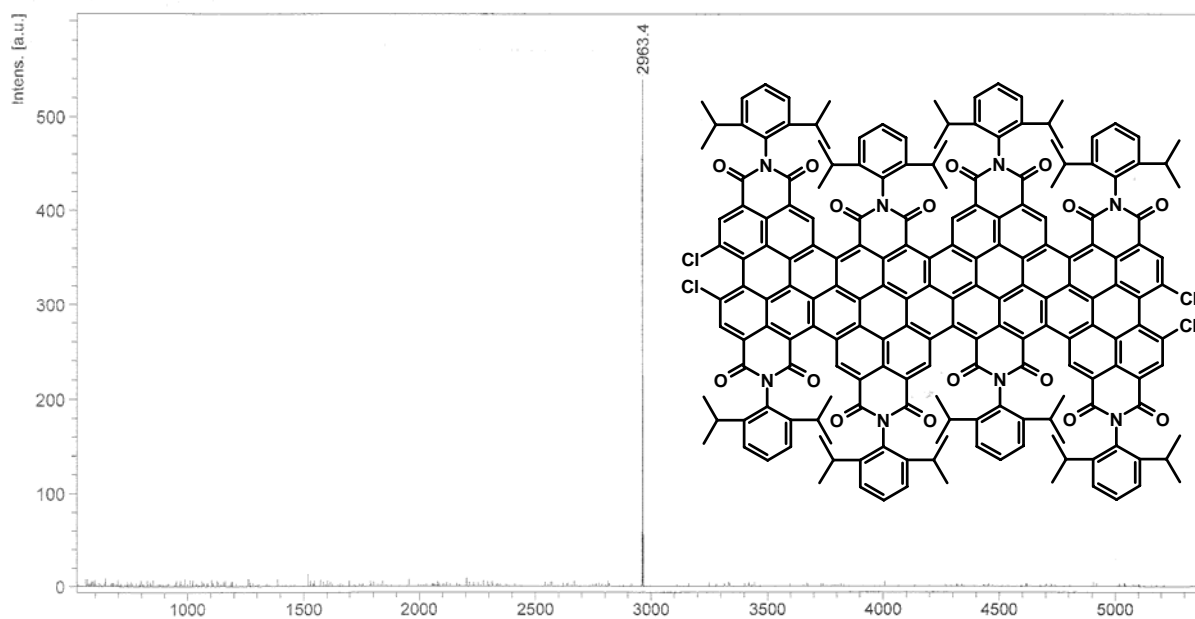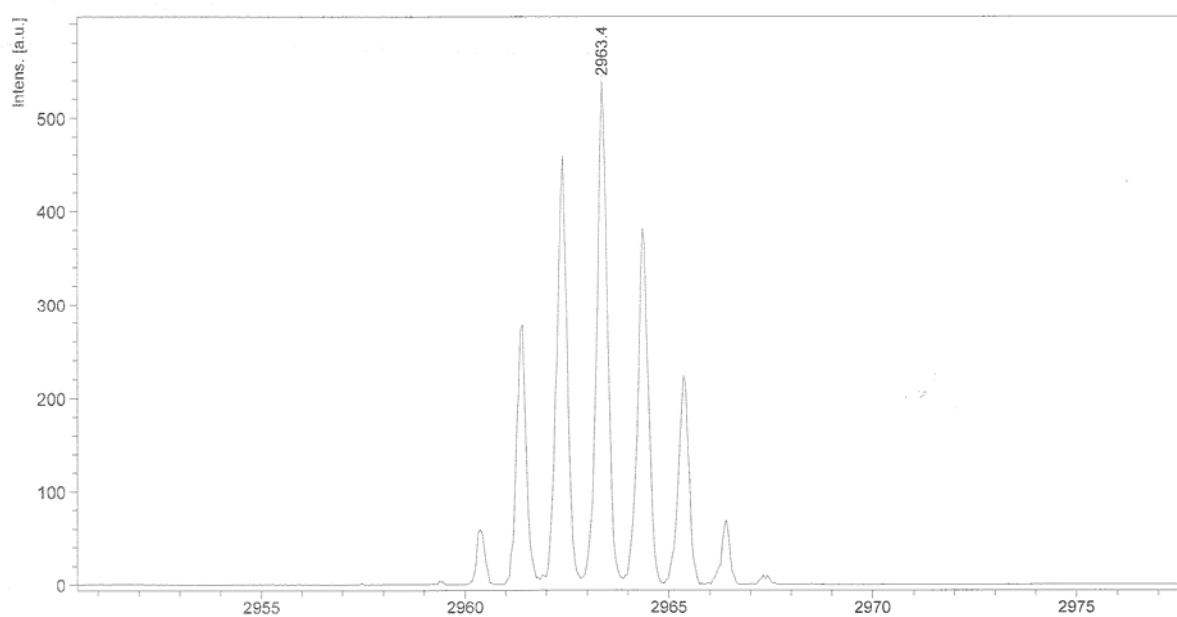

**$^1\text{H}$  NMR spectrum of 1a**

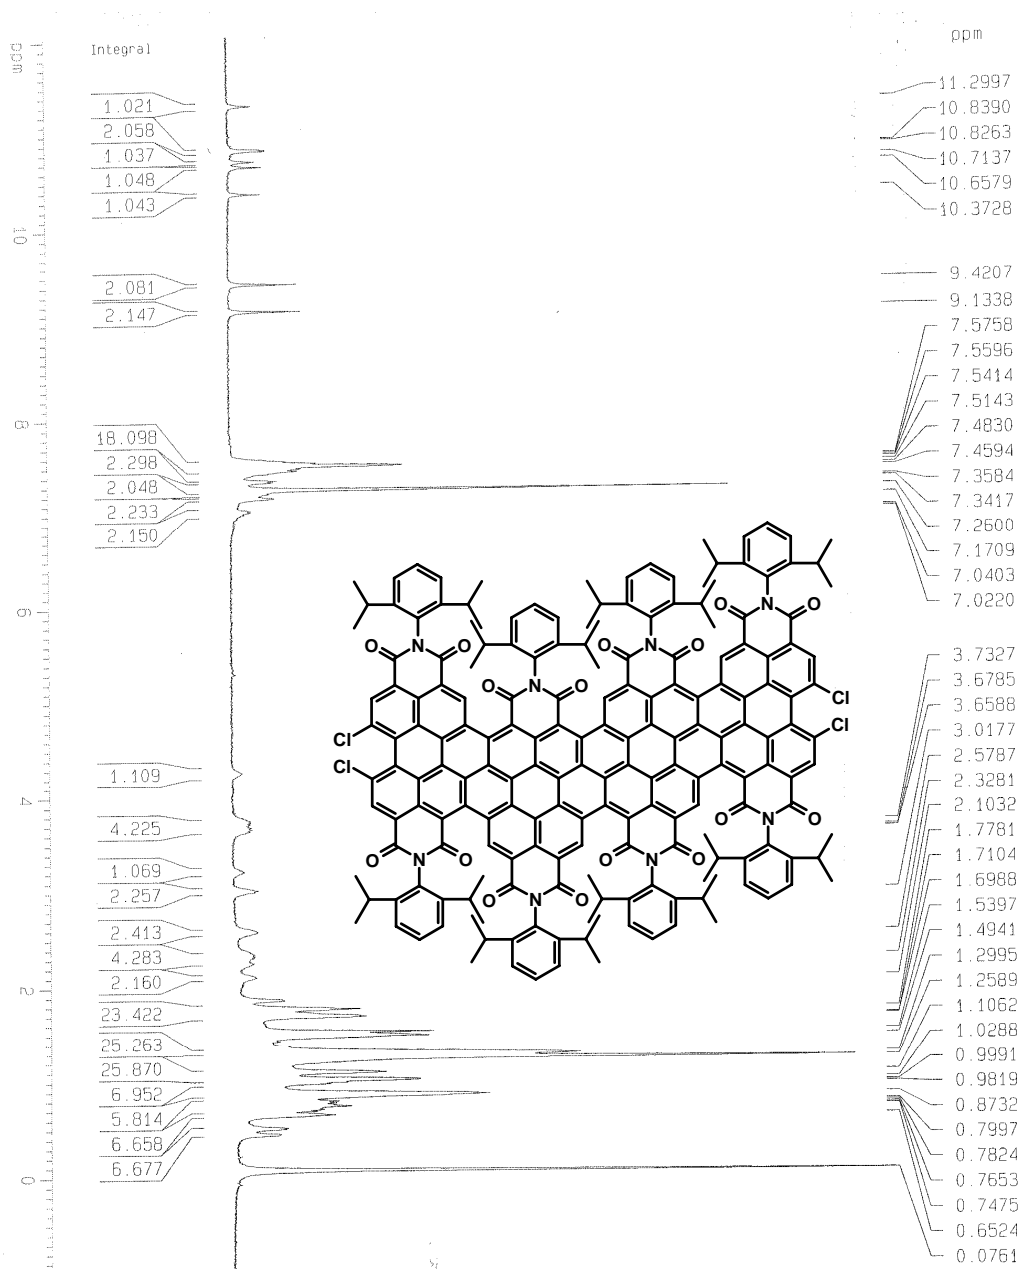

# <sup>1</sup>H NMR spectrum of 1b

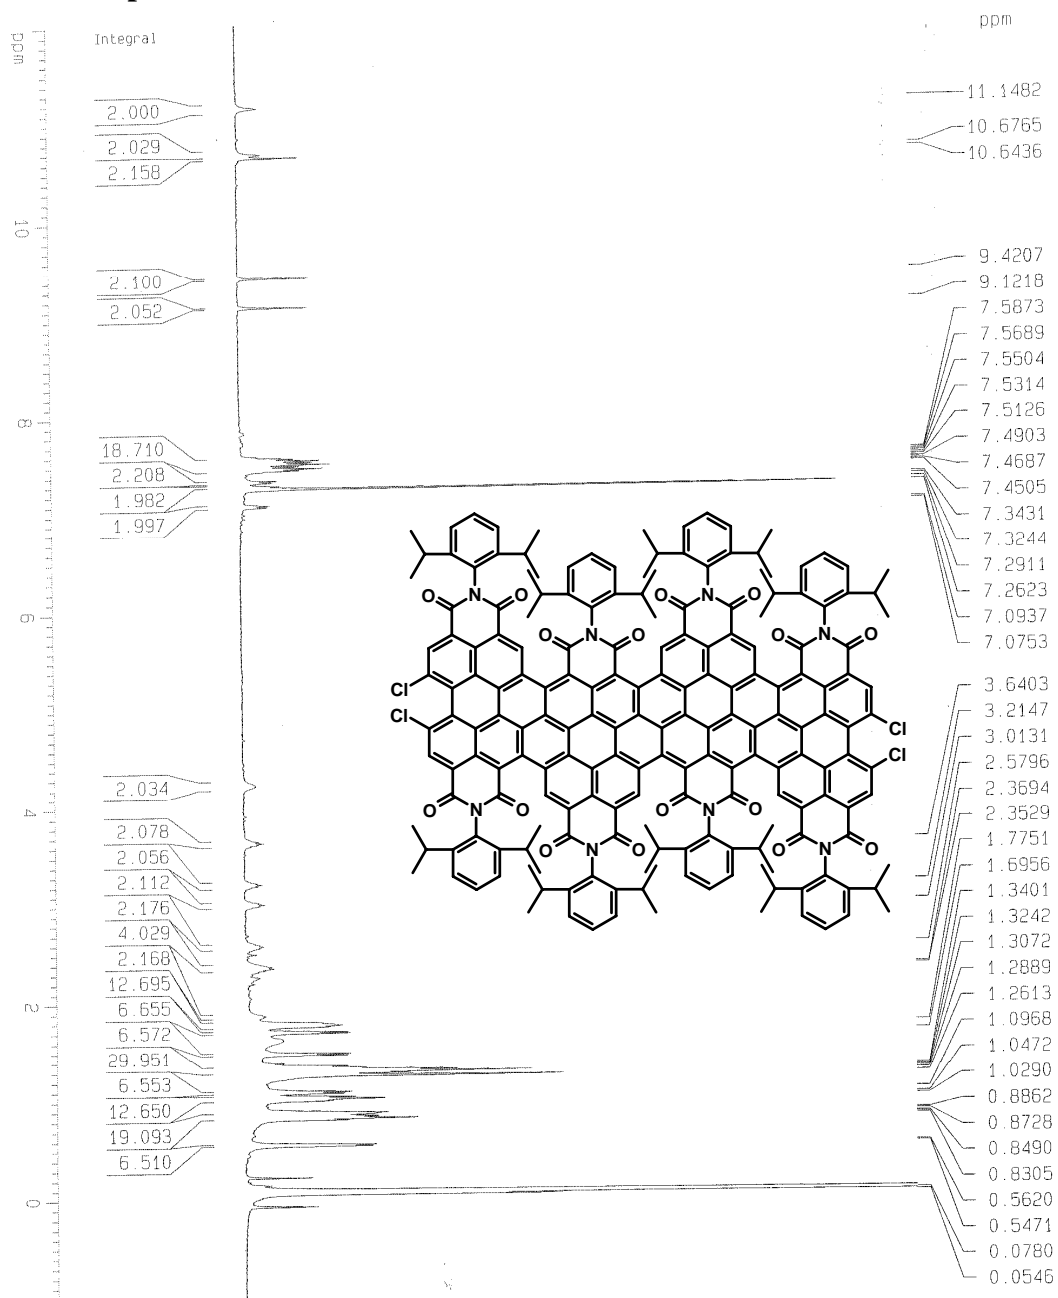

Supplement: b926618f.pdf [file b926618f.pdf]
